# Supplementary material for: Dissecting the Machinery That Introduces Disulfide Bonds in Pseudomonas aeruginosa
Source: PubMed Central journal article supplement — mBio. 2013 Dec 10;4(6):e00912-13. doi: 10.1128/mBio.00912-13 (PMC3870256; doi:10.1128/mbio.00912-13), 2013-12-10
Supplement: mbo006131686s1.pdf [file mbo006131686s1.pdf]

### *Conditions for PaDsbA2 crystallization*

Wild-type PaDsbA2 in 10 mM Hepes pH 7.0 and 100 mM NaCl buffer at three different protein concentrations was used for screening. The protein concentrations used were 2.9 mg/ml, 5.8 mg/ml and 11.6 mg/ml. The 2.9 mg/ml and 5.8 mg/ml protein concentrations were made from 11.6 mg/ml stock. JBScreen Cryo HTS, JBScreen JCSG++ HTS and JBScreen Classic 5-8 from Jena Bioscience were used to screen using 3 well Intelli plates. The drops were 100 nl protein to 100 nl crystallization solution and were set up using a robot. The crystallization was by vapor diffusion using sitting drops. After three weeks of incubation at 20°C, one hit was found in 20 % PEG 400, 30 % PEG 4000, 100 mM sodium citrate pH 5.6 50 mM ammonium citrate and another hit in 0.1 mM Bis-Tris pH 5.5, 2.0 M ammonium sulfate. Further optimization by changing ammonium sulfate concentration gave fewer and bigger crystals in 1.5 M ammonium sulfate.

### *Data collection*

Before data collection, the crystals were cryo-protected in mother liquor containing 20 % glycerol before flash freezing in liquid nitrogen. Highly redundant data for S-Sad phasing were collected in house on a rotating anode, Rigaku Micromax-007 HF from Rigaku comprising a Saturn944+ detector at 100 K by changing the kappa angle from 0° to 25° in increments of 5° for low and high resolution data. The redundant high resolution datasets were collected at a detector distance of 50 mm with 4 s exposure time and 1° oscillation range while redundant low resolution data sets were collected at a detector distance of 80 mm, 2.5 s exposure time and 1° oscillation range. Native high-resolution dataset was collected at a detector distance of 50 mm and  $2\theta$  -30°.

### Data processing

All data sets were integrated and scaled with Denzo and Scalepack (1) respectively. The redundant data set for phasing had an average multiplicity of 61.3 to 2.1 Å resolution with an overall R-merge of 0.02 and 99% completeness. The data set for refinement was integrated and scaled to 1.3 Å resolution with an overall R merge of 0.016 and 99.8% completeness. Statistics are shown in the table below.

|                                | <b>S-SAD DsbA2</b> | <b>Native DsbA2</b> |
|--------------------------------|--------------------|---------------------|
| Beamline                       | Home source        | Home source         |
| Wavelength (Å)                 | 1.54178            | 1.54178             |
| Space group                    | P212121            | P212121             |
| Unit cell                      |                    |                     |
| a (Å)                          | 47.815             | 47.815              |
| b (Å)                          | 59.280             | 59.280              |
| c (Å)                          | 59.879             | 59.879              |
| Resolution of phasing (Å)      | 30-2.1             | 42.049-1.30         |
| Number of measured reflections | 635872             | 215929              |
| Number of unique reflections   | 10377              | 41116               |
| Completeness                   | 99.8 (99.2)        | 96.5 (83.8)         |
| R <sub>merge</sub>             | 0.060 (0.136)      | 0.120 (0.773)       |
| <I/σ(I)>                       | 16.73 (2.8)        | 15.58 (3.53)        |
| Redundancy                     | 61.3(44.2)         | 5.3 (3.2)           |
| FOM                            |                    |                     |
| R <sub>free</sub> -factor      |                    | 0.2196              |
| Ramachandran profile           |                    |                     |
| Core                           |                    | 95.68 %             |
| Other allowed                  |                    | 4.32 %              |
| Disallowed                     |                    | 0.00%               |
| R.m.s. deviations              |                    |                     |
| Bond lengths (Å)               |                    | 0.023               |
| Bond angles (°)                | -                  | 2.283               |
|                                |                    | -                   |
| R-factor                       |                    | 0.1932              |
| PDB entry                      |                    |                     |

### *Structure solution and refinement*

Shelxc (2) was used to find the sulfur sites with data from 30 Å to 2.1 Å. In total five sulfur sites could be identified, though seven were the input. The heavy atom sites were input into MIPhare (3) for phasing. The initial phases and their figures of merit (FOM) were input into DM for density modification and subsequently into Buccaneer for automatic model building. Buccaneer automatically traced 80% of the structure with correct side chains and the rest the structure was built manually by iterative model building and refinement using Coot and Refmac (4) respectively using the 1.3-Å dataset.

### *Analysis of the electrostatic surface*

The PDB2PQR server (5) was used to convert the protein files into PQR format and charges were assigned using the PARSE force field (6). The APBS (Adaptive Poisson–Boltzmann Solver) plugin for PyMOL (DeLano Scientific; <http://www.pymol.org>) was used to map the electrostatic potential ( $\pm 3 kT/e$ ) on to the molecular surface of the protein.

## **References**

1. Otwinowski Z, DENZO. A Program for Automatic Evaluation of Film Densities., Departement of Molecular Biophysics and Biochemistry, Yale University, New Haven, Connecticut, USA, 1988
2. Sheldrick GM, Acta Crystallogr A 64:112-122, 2008
3. Otwinowski Z, Proceedings of the CCP4 Study Weekend. Isomorphous Replacement and Anomalous Scattering., p. 80-86. *In* Wolf W. EPR, Leslie A.G.W. (ed.), Warrington:Daresbury Laboratory, 1991
4. Winn MD, Isupov MN and Murshudov GN, Acta Crystallogr D 57:122-133, 2001
5. Dolinsky TJ, Nielsen JE, McCammon JA and Baker NA, Nucleic Acids Res 32:W665-667, 2004
6. Baker NA, Sept D, Joseph S, Holst MJ and McCammon JA, Proc Natl Acad Sci U S A 98:10037-10041, 2001
