# Supplementary material for: Dissecting the Machinery That Introduces Disulfide Bonds in Pseudomonas aeruginosa
Source: PubMed Central journal article supplement — mBio. 2013 Dec 10;4(6):e00912-13. doi: 10.1128/mBio.00912-13 (PMC3870256; doi:10.1128/mbio.00912-13), 2013-12-10
Supplement: mbo006131686s2.pdf [file mbo006131686s2.pdf]

### *Bacterial strains and growth conditions*

Bacterial strains are described in the table below. Strain JFC207 and JFC234 were constructed using P1 transduction standard procedures (1). The *E. coli* CC118 $\lambda$ pir strain was used to propagate pKNG101 and the derivative plasmids, while TGI and TOP10F' strains were used for other plasmid manipulations.

*E. coli* cultures were grown in LB or TSB medium at 37°C with shaking (200 rpm). When required, media were supplemented with ampicillin (50 or 200  $\mu$ g/ml), kanamycin (25 or 50  $\mu$ g/ml), streptomycin (30  $\mu$ g/ml), gentamycin (15  $\mu$ g/ml), L-arabinose (0.2 %) or D-glucose (0.4 %). To prepare *E. coli* periplasmic extracts, bacteria were grown in M63 minimal medium.

*P. aeruginosa* cultures were grown in LB or TSB medium at 37°C with shaking (130 rpm). When required, media were supplemented with streptomycin (2 mg/ml) or gentamycin (150  $\mu$ g/ml). *P. aeruginosa* transconjugants were screened on *Pseudomonas* isolation agar (PIA, Difco laboratories).

### *Plasmid constructions*

The plasmids and primers used in the present study are listed in the table below. The PaDsbA1, PaDsbA2, PaDsbB1 and PaDsbB2 expression vectors were constructed as follows: the coding DNA sequences encoding *PadsbA1*, *PadsbA2*, *PadsbB1* and *PadsbB2* were amplified from the chromosome of *P. aeruginosa* PA14 strain using the primers listed in the table below and inserted into the pET23a vector. PaDsbA1 and PaDsbA2 were cloned with and without signal sequence. Amplification reactions were run in 50  $\mu$ l reaction volumes containing Expand High Fidelity buffer 1X (kit Expand High Fidelity PCR System, Roche), 10 mM MgCl<sub>2</sub>, 1  $\mu$ M of each primer (Fw and Rv), 0.2 mM of each dNTP, 0.36 % DMSO or 60 mM betaine and 0.05 U/ $\mu$ l of Hifi polymerase (Roche). 1  $\mu$ l of genomic DNA (*P.*

*aeruginosa* PA14 - 50 ng/μl - obtained using the Pure link Genomic DNA Minikit, Invitrogen) was used as matrix. Hybridation was performed at 62°C for 30 sec, during 20 cycles. Sequences were checked by DNA sequencing (Beckman Coulter Genomics).

For kinetic experiments with membrane or total cell extracts, genes were subcloned from pET23a to pBAD33. The *PadsbA1*, *PadsbA2*, *PadsbB1* and *PadsbB2* genes were amplified from the pET23a expression vector using the primers listed in the table below. The ribosome binding site from pET23a was included in the amplified sequence. Amplification was done as previously described, using 480 to 900 ng of the various pET23a vectors as template. DNA samples were sent to Beckman Coulter Genomics (Essex, United Kingdom) to be sequenced on ABI\* 3730XL.

For *P. aeruginosa*, plasmid preparations were performed using the QIAprep spin kit (Qiagen). Recombinant plasmids were introduced in *P. aeruginosa* using the conjugative properties of pRK2013.

The expression plasmid for PaDsbA2<sub>CCSS</sub> was constructed by site-directed mutagenesis using the QuickChange Mutagenesis Protocol (Stratagene). Plasmid pETdsbA2-SS (without signal sequence) was used as a template. The expression plasmid for PaDsbA2<sub>CCSS</sub> was generated by replacing the codons for cysteines 111 and 157 by serine codons using primers PadsbA2C111S Fw and PadsbA2C111S Rv first and then primers PadsbA2C157S Fw and PadsbA2C157S Rv, yielding plasmid pETdsbA2-SS<sub>CCSS</sub>.

#### *Construction of PadsbA1, PadsbA2, PadsbB1, PadsbB2 and PadsbB1B2 mutants*

Unmarked, in-frame deletions of *PadsbA1*, *PadsbA2*, *PadsbB1* and *PadsbB2* were constructed in *P. aeruginosa* PA14 via allelic exchange as described in Ball et al. (2012) (2). 500 bp upstream (-500) and downstream (+500) regions of the target genes were PCR amplified and tandemly cloned in the pKNG101 using the -500Up/+500Dw primer pairs. The

resulting constructs (pKN $\Delta$ *PadsbA1*, pKN $\Delta$ *PadsbA2*, pKN $\Delta$ *PadsbB1* and pKN $\Delta$ *PadsbB2*) were transferred by conjugation in the wild type *P. aeruginosa* PA14 strain in order to generate the *PadsbA1*, *PadsbA2*, *PadsbB1* and *PadsbB2* mutants. The double mutant *PadsbB1B2* was constructed by deleting the *PadsbB2* gene in the *PadsbB1* mutant.

#### *Protein expression and purification*

Plasmids pET23a::*dsbA1*-SS and pET23a::*dsbA2*-SS<sub>CCSS</sub> were transformed into BL21 (DE3) competent cells, yielding strains IA14 and IA38, respectively. Plasmid pET23a::*dsbA2*-SS was transformed in Rosetta Gami competent cells, yielding strain IA20. During overnight cultures in LB medium containing 200  $\mu$ g/L of ampicillin at 37°C without shaking, cells reached an OD<sub>600nm</sub> between 0.5 and 0.8. Cells were then cultured aerobically (200 rpm shaking) at 37°C. After 30 min, protein expression was induced by adding 1 mM IPTG. Cells were harvested by centrifugation (Beckman Coulter JA-10 rotor, 2,800  $\times$  g, 4°C, 20 min) after 4h of induction. Cells were resuspended in 10 mL buffer A containing 50 mM NaPi pH 8.0 and 300 mM NaCl and disrupted by two passages through a French press (1500 psi). Cells lysates were then centrifuged during 40 min (Beckman Coulter JA-20 rotor, 23,600  $\times$  g, 4°C). Supernatants were recovered and diluted about 5 times in buffer A and filtered with a Minisart High-Flow filter (Sartorius, pores of 0.2  $\mu$ m diameter). Diluted supernatants were loaded on a HisPur Ni-NTA Chromatography Cartridge (1 ml, Thermo Scientific) at 1 ml/min. After washing the column, proteins were eluted using an imidazole gradient (0 to 180 mM in buffer A). The fractions containing the proteins were concentrated using a Vivaspinn-15 device (Sartorius) and desalted on a PD-10 column (GE healthcare) equilibrated with buffer B (50 mM NaPi pH 8.0 and 150 mM NaCl).

After the affinity chromatography, the proteins were loaded onto a Q-Sepharose column (GE healthcare) equilibrated with buffer C (20 mM Tris pH 8.0). The column was

washed with buffer C and PaDsbA2 was eluted with a 0 mM - 400 mM NaCl gradient in buffer C. The fractions containing the proteins were pooled, concentrated using a Vivaspin-15 device and desalted on a PD-10 column equilibrated with buffer B.

PaDsbA1 and PaDsbA2 were then loaded on a Superdex 200 gel filtration column equilibrated with buffer D (25 mM Hepes, pH 7.7, 100 mM NaCl) at a flow rate of 1 ml/min. The fractions containing the proteins were concentrated and the pure proteins stored in buffer D. Optical spectra were recorded with a Varian Cary 50 Bio UV-spectrophotometer.

The PaDsbA2 mutant protein (PaDsbA2<sub>CCSS</sub>) was purified by two successive passages through a nickel column HisPur Ni-NTA Chromatography Cartridge (Thermo Scientific), concentrated (Vivaspin-15) and desalted on a PD-10 column equilibrated with buffer A.

To express PaDsbB1 and PaDsbB2, pET23a::dsbB1 and pET23a::dsbB2 were transformed in *E. coli* BL21C43 competent cells, yielding strains IA17 and IA18, respectively. Cells were cultured aerobically in LB medium containing 200 µg/L of ampicillin at 37°C until they reached an OD<sub>600nm</sub> about 0.7. Expression of the proteins was induced by adding IPTG (500 µM for IA17 and IA18; 20 µM for IA53). Cells were harvested by centrifugation (Beckman Coulter JA-10 rotor, 2,800 × g, 20 min, 4°C) after 4h for IA17 and IA53 and 16h for IA18. Cells were resuspended in 10 mL buffer A containing 50 mM NaPi pH 8.0 and 300 mM NaCl and disrupted by two passages through a French press (1500 psi). The suspensions were then ultracentrifuged (Beckman Coulter 55.2 Ti rotor, 179,300 × g, 1h, 4°C). After centrifugation, the pellets were homogenized using a potter in 6.4 mL of buffer A supplemented with a cocktail of protease inhibitors (Roche (complete, EDTA-free)). Membrane proteins were solubilized using 2% N-dodecyl-β-D-maltoside (DDM) during 1h30 at 4°C on a roller. Proteins were recovered in the supernatant fraction after 1h ultracentrifugation (Beckman Coulter 55.2 Ti rotor, 179,300 × g, 4°C). Supernatants were diluted to a final volume of 50 mL, in buffer A containing 0.02% DDM and were loaded on

HisPur Ni-NTA Chromatography Cartridge (1 ml, Thermo Scientific) at 1 ml/min. After washing the column, proteins were eluted using an imidazole gradient (0 to 180 mM in buffer A). The fractions containing the proteins were concentrated using a Vivaspin-15 device (Sartorius) and desalted on a PD-10 column (GE healthcare) equilibrated with buffer E (50 mM NaPi pH 8.0, 150 mM NaCl and 0.1 % DDM).

| Strains                                | Genotype and characteristics                                                                                                                                                                                                                             | References            |
|----------------------------------------|----------------------------------------------------------------------------------------------------------------------------------------------------------------------------------------------------------------------------------------------------------|-----------------------|
| <b><i>E. coli</i> strains</b>          |                                                                                                                                                                                                                                                          |                       |
| MC1000                                 | F <sup>-</sup> λ <sup>-</sup> <i>araD139</i> Δ( <i>ara-leu</i> )7697 Δ( <i>lacIY</i> )74 <i>galU galK rpsL</i>                                                                                                                                           | (3)                   |
| XL-1-Blue                              | <i>endA1 gyrA96(nal<sup>R</sup>) thi-1 recA1 relA1 lac glnV44</i> F'[::Tn10 <i>proAB</i> <sup>+</sup> <i>lacI<sup>f</sup></i> Δ( <i>lacZ</i> )M15] <i>hsdR17</i> (r <sub>K</sub> <sup>-</sup> m <sub>K</sub> <sup>+</sup> )                              | Stratagene            |
| BL21 (DE3)                             | F <sup>-</sup> <i>ompT gal dcm lon hsdS<sub>B</sub></i> (r <sub>B</sub> <sup>-</sup> m <sub>B</sub> <sup>-</sup> ) λ(DE3 [ <i>lacI lacUV5-T7 gene 1 ind1 sam7 nin5</i> ])                                                                                | (4)                   |
| BL21C43 (DE3)                          | F <sup>-</sup> <i>ompT gal dcm lon hsdS<sub>B</sub></i> (r <sub>B</sub> <sup>-</sup> m <sub>B</sub> <sup>-</sup> ) λ(DE3 [ <i>lacI lacUV5-T7 gene 1 ind1 sam7 nin5</i> ]) and two uncharacterised mutations                                              | (5)                   |
| Rosetta-gami (DE3)                     | Δ( <i>ara-leu</i> )7697 Δ <i>lacX74</i> Δ <i>phoA PvuII phoR araD139 ahpC galE galK rpsL</i> (DE3) F' <i>[lac<sup>+</sup> lacI<sup>f</sup> pro] gor522::Tn10 trxB pRARE</i> (Cam <sup>R</sup> , Kan <sup>R</sup> , Str <sup>R</sup> , Tet <sup>R</sup> ) | Stratagene            |
| TG1                                    | <i>supE, hsdΔR, thiΔ (lac-proAB), F' (traD36, proAB<sup>+</sup>, lacIq, lacZΔM15)</i>                                                                                                                                                                    | Laboratory collection |
| CC118 ( <i>λpir</i> )                  | ( <i>λpir</i> ) Δ ( <i>ara-leu</i> ), <i>araD, ΔlacX74, galE, galK, phoA-20, thi-1, rpsE, rpoB, Arg</i> (Am), <i>recA1, Rfr</i> ( <i>λpir</i> )                                                                                                          | (6)                   |
| TOP10F <sup>'</sup>                    | F- <i>mcrA</i> Δ( <i>mrr-hsdRMS-mcrBC</i> ) φ80 <i>lacZΔM15</i> Δ <i>lacX74 nupG recA1 araD139</i> Δ( <i>ara-leu</i> )7697 <i>galE15 galK16 rpsL</i> (Str <sup>R</sup> ) <i>endA1</i> λ <sup>-</sup>                                                     | Invitrogen            |
| JFC234                                 | MC1000 <i>dsbB::kan</i>                                                                                                                                                                                                                                  | Laboratory collection |
| IA14                                   | BL21 carrying pETdsbA1-SS                                                                                                                                                                                                                                | This study            |
| IA20                                   | Rosetta-gami carrying pETdsbA2-SS                                                                                                                                                                                                                        | This study            |
| IA17                                   | BL21C43 carrying pETdsbB1                                                                                                                                                                                                                                | This study            |
| IA18                                   | BL21C43 carrying pETdsbB2                                                                                                                                                                                                                                | This study            |
| IA38                                   | BL21 carrying pETdsbA2-SS <sub>ccss</sub>                                                                                                                                                                                                                | This study            |
| IA32                                   | JFC234 carrying pBADdsbB1                                                                                                                                                                                                                                | This study            |
| IA33                                   | JFC234 carrying pBADdsbB2                                                                                                                                                                                                                                | This study            |
| IA34                                   | JFC234 carrying pBAD33                                                                                                                                                                                                                                   | This study            |
| <b><i>P. aeruginosa</i> strains</b>    |                                                                                                                                                                                                                                                          |                       |
| PA14                                   | PA14 clinical isolate from human burn patient                                                                                                                                                                                                            | (7)                   |
| <i>PadsbA1</i>                         | PA14 harboring a chromosomal deletion of <i>PadsbA1</i>                                                                                                                                                                                                  | This study            |
| <i>PadsbA2</i>                         | PA14 harboring a chromosomal deletion of <i>PadsbA2</i>                                                                                                                                                                                                  | This study            |
| <i>PadsbB1</i>                         | PA14 harboring a chromosomal deletion of <i>PadsbB1</i>                                                                                                                                                                                                  | This study            |
| <i>PadsbB2</i>                         | PA14 harboring a chromosomal deletion of <i>PadsbB2</i>                                                                                                                                                                                                  | This study            |
| <i>PadsbA1A2</i>                       | PA14 harboring a chromosomal deletion of <i>PadsbA1</i> & <i>PadsbA2</i>                                                                                                                                                                                 | This study            |
| <i>PadsbB1B2</i>                       | PA14 harboring a chromosomal deletion of <i>PadsbB1</i> & <i>PadsbB2</i>                                                                                                                                                                                 | This study            |
| Plasmids                               | Characteristics                                                                                                                                                                                                                                          | References            |
| pBAD33                                 | L-arabinose inducible, Cmr, p15A origin                                                                                                                                                                                                                  | (8)                   |
| pET23a                                 | T7 promoter, Ampr, fl origin, C-terminal His6-tag                                                                                                                                                                                                        | Novagen               |
| pET <i>PadsbA1</i> -SS                 | pET23a expressing PaDsbA1 (without signal sequence)                                                                                                                                                                                                      | This study            |
| pET <i>PadsbA2</i> -SS                 | pET23a expressing PaDsbA2 (without signal sequence)                                                                                                                                                                                                      | This study            |
| pET <i>PadsbB1</i>                     | pET23a expressing PaDsbB1                                                                                                                                                                                                                                | This study            |
| pET <i>PadsbB2</i>                     | pET23a expressing PaDsbB2                                                                                                                                                                                                                                | This study            |
| pET <i>PadsbA2</i> -SS <sub>ccss</sub> | pET23a expressing PaDsbA2 (without signal sequence, cysteines 111 and 157 are replaced by serine)                                                                                                                                                        | This study            |

|                     |                                                                         |            |
|---------------------|-------------------------------------------------------------------------|------------|
| pBAD <i>PadsbB1</i> | pBAD33 expressing PaDsbB1                                               | This study |
| pBAD <i>PadsbB2</i> | pBAD33 expressing PaDsbB2                                               | This study |
| pCR2.1              | TA cloning, lacZ, ColE1, fl ori, ApR KmR                                | Invitrogen |
| pRK2013             | Tra+, Mob+, ColE1, KmR                                                  | (9)        |
| pKNG101             | oriR6K, mobRK2, sacBR+, SmR (suicide vector)                            | (10)       |
| pJN105              | GmR ,araC-pBAD,(broad host range vector)                                | (11)       |
| pKNΔ <i>PadsbA1</i> | 500 bp upstream and 500 bp downstream <i>PadsbA1</i> in pKNG101         | This study |
| pKNΔ <i>PadsbA2</i> | 500 bp upstream and 500 bp downstream <i>PadsbA2</i> in pKNG101         | This study |
| pKNΔ <i>PadsbB1</i> | 500 bp upstream and 500 bp downstream <i>PadsbB1</i> in pKNG101         | This study |
| pKNΔ <i>PadsbB2</i> | 500 bp upstream and 500 bp downstream <i>PadsbB2</i> in pKNG101         | This study |
| pJN <i>PadsbA1</i>  | 860 bp DNA fragment containing the <i>PadsbA1</i> gene cloned in pJN105 | This study |
| pJN <i>PadsbB1</i>  | 620bp DNA fragment containing the <i>PadsbB1</i> gene cloned in pJN105  | This study |
| pJN <i>PadsbB2</i>  | 617bp DNA fragment containing the <i>PadsbB2</i> gene cloned in pJN105  | This study |

| Primers                             | Sequences                                    |
|-------------------------------------|----------------------------------------------|
| <b>Cloning</b>                      |                                              |
| PA14 <i>PadsbA1</i> Fw (without SS) | TTACATATGGACGACTATAACCGCCGGC                 |
| PA14 <i>PadsbA1</i> Rv              | TTACTCGAGCTTCTTGCCGCTGCGCGC                  |
| PA14 <i>PadsbA2</i> Fw (without SS) | TTACATATGGTAGAGCTTCTGGTGAAG                  |
| PA14 <i>PadsbA2</i> Rv              | TTACTCGAGGAGATCCTTGCTAGCCAG                  |
| PA14 <i>PadsbB1</i> Fw              | TTACATATGAGCGCTCTCCTCAAGCC                   |
| PA14 <i>PadsbB1</i> Rv              | TTACTCGAGGGCGGTGCGGCGGCC                     |
| PA14 <i>PadsbB2</i> Fw              | TTACATATGCCCCTGGCCAGCCC                      |
| PA14 <i>PadsbB2</i> Rv              | TTACTCGAGGGCACGTCCGGAGGAAGT                  |
| pET <i>Padsb</i> Fw                 | TTAGAGCTCTAATTTTGTTTAACTTTAAGAAGG            |
| pET <i>PadsbB1</i> Rv               | TTAGTCTGACTCAGGCGGTGCGGCGGCCG                |
| pET <i>PadsbB2</i> Rv               | TTAGTCTGACTCAGGCACGTCCGGAGGAAGT              |
| pJN <i>PadsbA1</i> Fw               | GTCACAGGAGGGGTTCACTC                         |
| pJN <i>PadsbA1</i> Rv               | TACAATGCTGGAACCCGTGA                         |
| pJN <i>PadsbA2</i> Fw               | ACATCCACAGCCTGATACGG                         |
| pJN <i>PadsbA2</i> Rv               | CCAAAAGAGGGATGTTGGAA                         |
| pJN <i>PadsbB1</i> Fw               | TAGCGAATTCCTGCAGTTAATCTTCGGGCAATCCTG         |
| pJN <i>PadsbB1</i> Rv               | TTAATGGTGATGGTGATGATGGGCGGTGCGGCGGCCGAA      |
| pJN <i>PadsbB2</i> Fw               | TAGCGAATTCCTGCAGGCATGATTCGGGATGTCTTG         |
| pJN <i>PadsbB2</i> Rv               | TTAATGGTGATGGTGATGATGGGCACGTCCGGAGGAAGTGCAC  |
| <b>Site directed mutagenesis</b>    |                                              |
| PaDsbA2C111S Fw                     | CAGGCTCGCCTGGTGGAGAGCGCGGGGATCCAAGGCGGC      |
| PaDsbA2C111S Rv                     | GCCGCTTGATCCCCGCGCTCTCCACCAGGCGAGCCTG        |
| PaDsbA2C157S Fw                     | CAGGCTCGACTGGAGAAAAGTGCGAAAGACAACGAACCTTATTG |
| PaDsbA2C157S Rv                     | CAATAAGTTCGTTGCTTTTCGCACTTTTCTCCAGTCGAGCCTG  |
| <b>Gene deletion</b>                |                                              |
| <i>PadsbA1</i> -500Up               | GCAGATGCATGACATCAAGGAC                       |
| <i>PadsbA1</i> -500Dw               | CACCTTGCCTAACGCATCGTTCACTCCTA                |
| <i>PadsbA1</i> +500Up               | GAGTGAACGATGCGTTAGGCAAGGTGATTTCG             |
| <i>PadsbA1</i> +500Dw               | AGATGCATCATCACTACCACCAG                      |
| <i>PadsbA2</i> -500Up               | CGAAGTAGAGAAGATATCCAGGTTTC                   |
| <i>PadsbA2</i> -500Dw               | GCGACGCTAGAGGAGTCTCACGCTTGC                  |
| <i>PadsbA2</i> +500Up               | GCGTGAGACTCCTCTAGCGTCGCGCC                   |
| <i>PadsbA2</i> +500Dw               | AGCAGTACCAGTAGTACGCCAAC                      |
| <i>PadsbB1</i> -500Up               | AAGGGGATCAACAGGATGC                          |
| <i>PadsbB1</i> -500Dw               | CGGCGCTGTCAGGCGCTCAAGGCAGGGATTC              |
| <i>PadsbB1</i> +500Up               | CCTGCCTTGAGCGCTGACAGCGCCGATATC               |
| <i>PadsbB1</i> +500Dw               | GTATTCCTGTACCGACTTGACGTAG                    |
| <i>PadsbB2</i> -500Up               | AGGAAGAGGCTGAAGAAGTCCT                       |
| <i>PadsbB2</i> -500Dw               | GTCAGGCACGTGCGATGGCGGATCCACAG                |
| <i>PadsbB2</i> +500Up               | GTGGATCCGCCATGCGACGTGCCTGAC                  |

## References

1. Bremer E, Silhavy TJ and Weinstock GM, *J Bacteriol* 162:1092-1099, 1985
2. Ball G, Viarre V, Garvis S, Voulhoux R and Filloux A, *Res Microbiol* 163:457-469, 2012
3. Casadaban MJ and Cohen SN, *J Mol Biol* 138:179-207, 1980
4. Studier FW and Moffatt BA, *J Mol Biol* 189:113-130, 1986
5. Miroux B and Walker JE, *J Mol Biol* 260:289-298, 1996
6. Herrero M, de Lorenzo V and Timmis KN. *J Bacteriol* 172:6557-6567, 1990
7. Liberati NT, Urbach JM, Miyata S, Lee DG, Drenkard E, Wu G, Villanueva J, Wei T and Ausubel FM, *Proc Natl Acad Sci U S A* 103:2833-2838, 2006
8. Guzman LM, Belin D, Carson MJ and Beckwith J, *J Bacteriol* 177:4121-4130, 1995
9. Figurski DH and Helinski DR, *Proc Natl Acad Sci U S A* 76:1648-1652, 1979
10. Kaniga K, Delor I and Cornelis GR, *Gene* 109:137-141, 1991
11. Newman JR and Fuqua C. 1999, *Gene* 227:197-203, 1999
