# Supplementary material for: Dissecting the Machinery That Introduces Disulfide Bonds in Pseudomonas aeruginosa
Source: PubMed Central journal article supplement — mBio. 2013 Dec 10;4(6):e00912-13. doi: 10.1128/mBio.00912-13 (PMC3870256; doi:10.1128/mbio.00912-13), 2013-12-10
Supplement: mbo006131686st2.pdf [file mbo006131686st2.pdf]

| Average Spectral Counts across all the proteins |                                                        | 9.96 | 9.3                | 8.01 | 9.71               | 8.82 | 9.72               |         |      |        |                      |        |                      |        |                      |         |     |       |                  |      |
|-------------------------------------------------|--------------------------------------------------------|------|--------------------|------|--------------------|------|--------------------|---------|------|--------|----------------------|--------|----------------------|--------|----------------------|---------|-----|-------|------------------|------|
| Description                                     | # cys                                                  | WT-1 | WT-1<br>normalized | WT-2 | WT-2<br>normalized | WT-3 | WT-3<br>normalized | average | sd   | dsbA-1 | dsbA-1<br>normalized | dsbA-2 | dsbA-2<br>normalized | dsbA-3 | dsbA-3<br>normalized | average | sd  | ratio | p (t<br>student) |      |
| <b>Inner membrane proteins</b>                  |                                                        |      |                    |      |                    |      |                    |         |      |        |                      |        |                      |        |                      |         |     |       |                  |      |
| Q02UQ2                                          | Putative chemotaxis transducer OS=Pseudomonas aer      | 0    | 2                  | 0.2  | 10                 | 1.1  | 4                  | 0.5     | 0.6  | 0.4    | 0                    | 0.0    | 0                    | 0.0    | 0                    | 0.0     | 0.0 | 0.0   | 0.0              | 0.08 |
| Q02UD7                                          | Sulfate transport protein CysA OS=Pseudomonas aer      | 1    | 1                  | 0.1  | 1                  | 0.1  | 1                  | 0.1     | 0.1  | 0.0    | 0                    | 0.0    | 0                    | 0.0    | 0                    | 0.0     | 0.0 | 0.0   | 0.00             |      |
| Q02IZ1                                          | Probable transglycolase OS=Pseudomonas aeruginosi      | 2    | 12                 | 1.2  | 11                 | 1.2  | 10                 | 1.2     | 1.2  | 0.0    | 1                    | 0.1    | 5                    | 0.6    | 7                    | 0.7     | 0.5 | 0.3   | 0.4              | 0.02 |
| Q02P75                                          | Putative iron transport system substrate-binding prot  | 3    | 3                  | 0.3  | 4                  | 0.4  | 2                  | 0.2     | 0.3  | 0.1    | 0                    | 0.0    | 1                    | 0.1    | 1                    | 0.1     | 0.1 | 0.1   | 0.2              | 0.02 |
| Q02DZ6                                          | Phosphate ABC transporter, ATP-binding protein OS=     | 4    | 1                  | 0.1  | 1                  | 0.1  | 1                  | 0.1     | 0.1  | 0.0    | 0                    | 0.0    | 0                    | 0.0    | 0                    | 0.0     | 0.0 | 0.0   | 0.00             |      |
| Q02DR7                                          | Putative uncharacterized protein OS=Pseudomonas a      | 6    | 1                  | 0.1  | 1                  | 0.1  | 1                  | 0.1     | 0.1  | 0.0    | 0                    | 0.0    | 0                    | 0.0    | 0                    | 0.0     | 0.0 | 0.0   | 0.00             |      |
| Q02F63                                          | Putative uncharacterized protein OS=Pseudomonas a      | 7    | 2                  | 0.2  | 3                  | 0.3  | 2                  | 0.2     | 0.3  | 0.1    | 0                    | 0.0    | 0                    | 0.0    | 1                    | 0.1     | 0.0 | 0.1   | 0.1              | 0.01 |
| Q02QD0                                          | Putative ATP-dependent helicase OS=Pseudomonas a       | 8    | 3                  | 0.3  | 4                  | 0.4  | 5                  | 0.6     | 0.5  | 0.2    | 0                    | 0.0    | 2                    | 0.2    | 1                    | 0.1     | 0.1 | 0.1   | 0.2              | 0.04 |
| Q02TI8                                          | Putative uncharacterized protein OS=Pseudomonas a      | 10   | 2                  | 0.2  | 1                  | 0.1  | 2                  | 0.2     | 0.2  | 0.1    | 1                    | 0.1    | 0                    | 0.0    | 0                    | 0.0     | 0.1 | 0.2   | 0.05             |      |
| <b>Periplasmic proteins</b>                     |                                                        |      |                    |      |                    |      |                    |         |      |        |                      |        |                      |        |                      |         |     |       |                  |      |
| Q02TC6                                          | Putative tail length determination protein OS=Pseudoc  | 0    | 2                  | 0.2  | 1                  | 0.1  | 1                  | 0.1     | 0.1  | 0.0    | 0                    | 0.0    | 0                    | 0.0    | 0                    | 0.0     | 0.0 | 0.0   | 0.01             |      |
| Q02IZ9                                          | D-alanyl-D-alanine-endopeptidase OS=Pseudomonas        | 1    | 6                  | 0.6  | 9                  | 1.0  | 4                  | 0.5     | 0.7  | 0.2    | 1                    | 0.1    | 3                    | 0.3    | 2                    | 0.2     | 0.1 | 0.3   | 0.04             |      |
| Q02UB6                                          | Polyamine transport protein OS=Pseudomonas aerug       | 2    | 56                 | 5.6  | 36                 | 3.9  | 28                 | 3.5     | 4.3  | 1.1    | 14                   | 1.4    | 23                   | 2.6    | 14                   | 1.4     | 1.8 | 0.7   | 0.4              | 0.03 |
| Q02PL1                                          | Putative D-alanyl-D-alanine carboxypeptidase OS=Psr    | 2    | 2                  | 0.2  | 3                  | 0.3  | 1                  | 0.1     | 0.2  | 0.1    | 0                    | 0.0    | 0                    | 0.0    | 0                    | 0.0     | 0.0 | 0.0   | 0.02             |      |
| Q02E10                                          | Putative periplasmic monofunctional chorismate muta    | 2    | 11                 | 1.1  | 9                  | 1.0  | 12                 | 1.5     | 1.2  | 0.3    | 0                    | 0.0    | 0                    | 0.0    | 0                    | 0.0     | 0.0 | 0.0   | 0.00             |      |
| Q02PI4                                          | Putative soluble lytic transglycosylase OS=Pseudomoi   | 3    | 4                  | 0.4  | 10                 | 1.1  | 4                  | 0.5     | 0.7  | 0.4    | 0                    | 0.0    | 0                    | 0.0    | 0                    | 0.0     | 0.0 | 0.0   | 0.04             |      |
| Q02N84                                          | Putative periplasmic spermidine/putrescine-binding pr  | 3    | 23                 | 2.3  | 16                 | 1.7  | 9                  | 1.1     | 1.7  | 0.6    | 1                    | 0.1    | 5                    | 0.6    | 4                    | 0.4     | 0.2 | 0.2   | 0.02             |      |
| Q02TF9                                          | Putative binding protein component of ABC transport    | 3    | 18                 | 1.8  | 16                 | 1.7  | 9                  | 1.1     | 1.6  | 0.4    | 2                    | 0.2    | 1                    | 0.1    | 2                    | 0.2     | 0.1 | 0.1   | 0.00             |      |
| Q02QW4                                          | Cyclohexadienyl dehydratase OS=Pseudomonas aeru        | 3    | 16                 | 1.6  | 11                 | 1.2  | 10                 | 1.2     | 1.3  | 0.2    | 1                    | 0.1    | 8                    | 0.9    | 3                    | 0.3     | 0.4 | 0.4   | 0.03             |      |
| Q02GU4                                          | Putative binding protein component of ABC transport    | 4    | 13                 | 1.3  | 12                 | 1.3  | 12                 | 1.5     | 1.4  | 0.1    | 5                    | 0.5    | 7                    | 0.8    | 3                    | 0.3     | 0.5 | 0.2   | 0.01             |      |
| Q02DY4                                          | Putative glycine betaine/L-proline ABC transporter, pe | 4    | 23                 | 2.3  | 18                 | 1.9  | 10                 | 1.2     | 1.8  | 0.5    | 3                    | 0.3    | 6                    | 0.7    | 6                    | 0.6     | 0.5 | 0.2   | 0.02             |      |
| Q02E45                                          | Putative binding protein component of ABC dipeptide    | 4    | 24                 | 2.4  | 13                 | 1.4  | 12                 | 1.5     | 1.8  | 0.6    | 1                    | 0.1    | 8                    | 0.9    | 2                    | 0.2     | 0.4 | 0.4   | 0.03             |      |
| Q02ER3                                          | Putative ABC transporter, periplasmic substrate-bindir | 4    | 11                 | 1.1  | 8                  | 0.9  | 5                  | 0.6     | 0.9  | 0.2    | 1                    | 0.1    | 1                    | 0.1    | 0                    | 0.0     | 0.1 | 0.1   | 0.01             |      |
| Q02GT9                                          | Putative binding protein component of ABC dipeptid     | 5    | 35                 | 3.5  | 33                 | 3.5  | 31                 | 3.9     | 3.6  | 0.2    | 7                    | 0.7    | 10                   | 1.1    | 10                   | 1.0     | 0.2 | 0.3   | 0.00             |      |
| Q02S18                                          | Putative amino-acid ABC transporter binding protei O   | 5    | 4                  | 0.4  | 4                  | 0.4  | 5                  | 0.6     | 0.5  | 0.1    | 0                    | 0.0    | 0                    | 0.0    | 0                    | 0.0     | 0.0 | 0.0   | 0.00             |      |
| <b>Outer membrane proteins</b>                  |                                                        |      |                    |      |                    |      |                    |         |      |        |                      |        |                      |        |                      |         |     |       |                  |      |
| Q02L18                                          | Staphylolytic protease preproenzyme LasA OS=Pseud      | 4    | 23                 | 2.3  | 27                 | 2.9  | 17                 | 2.1     | 2.4  | 0.4    | 2                    | 0.2    | 5                    | 0.6    | 5                    | 0.5     | 0.4 | 0.2   | 0.00             |      |
| Q02TC1                                          | Putative phage-related protein, tail component OS=P    | 4    | 8                  | 0.8  | 7                  | 0.8  | 8                  | 1.0     | 0.9  | 0.1    | 2                    | 0.2    | 4                    | 0.5    | 3                    | 0.3     | 0.3 | 0.1   | 0.4              | 0.01 |
| Q02DR8                                          | Putative uncharacterized protein OS=Pseudomonas a      | 8    | 33                 | 3.3  | 31                 | 3.3  | 23                 | 2.9     | 3.2  | 0.3    | 1                    | 0.1    | 3                    | 0.3    | 1                    | 0.1     | 0.2 | 0.1   | 0.00             |      |
| <b>Extracellular proteins</b>                   |                                                        |      |                    |      |                    |      |                    |         |      |        |                      |        |                      |        |                      |         |     |       |                  |      |
| Q02IF1                                          | ExoU OS=Pseudomonas aeruginosa (strain UCBBP-PA        | 0    | 14                 | 1.4  | 25                 | 2.7  | 25                 | 3.1     | 2.4  | 0.9    | 0                    | 0.0    | 5                    | 0.6    | 1                    | 0.1     | 0.2 | 0.3   | 0.1              | 0.02 |
| Q02KJ9                                          | Translocator protein PopB OS=Pseudomonas aerugin       | 0    | 8                  | 0.8  | 18                 | 1.9  | 12                 | 1.5     | 1.4  | 0.6    | 0                    | 0.0    | 4                    | 0.5    | 1                    | 0.1     | 0.2 | 0.2   | 0.1              | 0.03 |
| Q02KK0                                          | Translocator outer membrane protein PopD OS=Pseu       | 0    | 4                  | 0.4  | 11                 | 1.2  | 7                  | 0.9     | 0.8  | 0.4    | 0                    | 0.0    | 1                    | 0.1    | 1                    | 0.1     | 0.1 | 0.1   | 0.03             |      |
| Q02KJ7                                          | Type III secretion protein PcrV OS=Pseudomonas aer     | 0    | 3                  | 0.3  | 7                  | 0.8  | 6                  | 0.7     | 0.6  | 0.3    | 0                    | 0.0    | 1                    | 0.1    | 0                    | 0.0     | 0.0 | 0.1   | 0.02             |      |
| Q02M97                                          | Chitinase OS=Pseudomonas aeruginosa (strain UCBP)      | 1    | 24                 | 2.4  | 28                 | 3.0  | 17                 | 2.1     | 2.5  | 0.5    | 12                   | 1.2    | 13                   | 1.5    | 8                    | 0.8     | 1.2 | 0.3   | 0.5              | 0.01 |
| Q02GR5                                          | Type IV pilin structural subunit OS=Pseudomonas aer    | 2    | 4                  | 0.4  | 4                  | 0.4  | 4                  | 0.5     | 0.4  | 0.1    | 0                    | 0.0    | 1                    | 0.1    | 3                    | 0.3     | 0.1 | 0.2   | 0.03             |      |
| Q02PA2                                          | Putative aminopeptidase OS=Pseudomonas aeruginos       | 6    | 33                 | 3.3  | 42                 | 4.5  | 17                 | 2.1     | 3.3  | 1.2    | 3                    | 0.3    | 3                    | 0.3    | 3                    | 0.3     | 0.0 | 0.1   | 0.01             |      |
| Q02I11                                          | Chitin-binding protein CbpD OS=Pseudomonas aerug       | 8    | 173                | 17.4 | 122                | 13.1 | 73                 | 9.1     | 13.2 | 4.1    | 24                   | 2.5    | 32                   | 3.6    | 25                   | 2.6     | 2.9 | 0.6   | 0.2              | 0.01 |
| Q02TJ3                                          | Putative uncharacterized protein OS=Pseudomonas a      | 9    | 28                 | 2.8  | 19                 | 2.0  | 22                 | 2.7     | 2.5  | 0.4    | 0                    | 0.0    | 2                    | 0.2    | 0                    | 0.0     | 0.1 | 0.1   | 0.00             |      |
| Q02L61                                          | Putative halovibrin OS=Pseudomonas aeruginosa (str     | 10   | 2                  | 0.2  | 5                  | 0.5  | 4                  | 0.5     | 0.4  | 0.2    | 0                    | 0.0    | 1                    | 0.1    | 1                    | 0.1     | 0.1 | 0.1   | 0.04             |      |
| <b>Non cytoplasmic proteins</b>                 |                                                        |      |                    |      |                    |      |                    |         |      |        |                      |        |                      |        |                      |         |     |       |                  |      |
| Q02K64                                          | Putative uncharacterized protein OS=Pseudomonas a      | 2    | 30                 | 3.0  | 20                 | 2.2  | 32                 | 4.0     | 3.1  | 0.9    | 8                    | 0.8    | 13                   | 1.5    | 19                   | 2.0     | 1.4 | 0.6   | 0.5              | 0.06 |
| Q02ES8                                          | Putative uncharacterized protein OS=Pseudomonas a      | 2    | 2                  | 0.2  | 1                  | 0.1  | 2                  | 0.2     | 0.2  | 0.1    | 0                    | 0.0    | 0                    | 0.0    | 0                    | 0.0     | 0.0 | 0.0   | 0.01             |      |
| Q02E70                                          | Phosphorylcholine phosphatase OS=Pseudomonas ae        | 2    | 5                  | 0.5  | 5                  | 0.5  | 4                  | 0.5     | 0.5  | 0.0    | 3                    | 0.3    | 2                    | 0.2    | 1                    | 0.1     | 0.2 | 0.1   | 0.4              | 0.01 |
| Q02IK9                                          | Putative uncharacterized protein OS=Pseudomonas a      | 2    | 10                 | 1.0  | 6                  | 0.6  | 7                  | 0.9     | 0.8  | 0.2    | 0                    | 0.0    | 1                    | 0.1    | 0                    | 0.0     | 0.0 | 0.1   | 0.00             |      |
| Q02GG4                                          | Putative uncharacterized protein OS=Pseudomonas a      | 2    | 11                 | 1.1  | 6                  | 0.6  | 4                  | 0.5     | 0.7  | 0.3    | 0                    | 0.0    | 0                    | 0.0    | 1                    | 0.1     | 0.0 | 0.1   | 0.02             |      |
| Q02PL9                                          | Putative carboxypeptidase OS=Pseudomonas aerugin       | 3    | 19                 | 1.9  | 17                 | 1.8  | 12                 | 1.5     | 1.7  | 0.2    | 0                    | 0.0    | 1                    | 0.1    | 2                    | 0.2     | 0.1 | 0.1   | 0.00             |      |
| Q02QQ2                                          | Putative uncharacterized protein OS=Pseudomonas a      | 3    | 1                  | 0.1  | 3                  | 0.3  | 2                  | 0.2     | 0.2  | 0.1    | 0                    | 0.0    | 0                    | 0.0    | 0                    | 0.0     | 0.0 | 0.0   | 0.03             |      |
| Q02E92                                          | Putative ABC-type amino acid transporter OS=Pseudoc    | 3    | 5                  | 0.5  | 4                  | 0.4  | 2                  | 0.2     | 0.4  | 0.1    | 0                    | 0.0    | 0                    | 0.0    | 0                    | 0.0     | 0.0 | 0.0   | 0.01             |      |
| Q02KQ9                                          | Putative uncharacterized protein OS=Pseudomonas a      | 3    | 4                  | 0.4  | 3                  | 0.3  | 4                  | 0.5     | 0.4  | 0.1    | 0                    | 0.0    | 2                    | 0.2    | 1                    | 0.1     | 0.1 | 0.1   | 0.3              | 0.02 |
| Q02PL8                                          | Putative hydrolase OS=Pseudomonas aeruginosa (str      | 4    | 23                 | 2.3  | 18                 | 1.9  | 21                 | 2.6     | 2.3  | 0.3    | 2                    | 0.2    | 8                    | 0.9    | 7                    | 0.7     | 0.6 | 0.4   | 0.3              | 0.00 |
| Q02ST2                                          | Putative periplasmic protein OS=Pseudomonas aerug      | 4    | 4                  | 0.4  | 3                  | 0.3  | 2                  | 0.2     | 0.3  | 0.1    | 0                    | 0.0    | 0                    | 0.0    | 0                    | 0.0     | 0.0 | 0.0   | 0.00             |      |
| Q02P64                                          | Putative uncharacterized protein OS=Pseudomonas a      | 4    | 8                  | 0.8  | 6                  | 0.6  | 5                  | 0.6     | 0.7  | 0.1    | 0                    | 0.0    | 1                    | 0.1    | 2                    | 0.2     | 0.1 | 0.1   | 0.2              | 0.00 |
| Q02H56                                          | Putative uncharacterized protein OS=Pseudomonas a      | 6    | 12                 | 1.2  | 7                  | 0.8  | 5                  | 0.6     | 0.9  | 0.3    | 0                    | 0.0    | 1                    | 0.1    | 2                    | 0.2     | 0.1 | 0.1   | 0.1              | 0.02 |
| Q02F52                                          | Putative uncharacterized protein OS=Pseudomonas a      | 6    | 3                  | 0.3  | 4                  | 0.4  | 1                  | 0.1     | 0.3  | 0.2    | 0                    | 0.0    | 0                    | 0.0    | 0                    | 0.0     | 0.0 | 0.0   | 0.03             |      |
| Q02IE4                                          | Putative uncharacterized protein OS=Pseudomonas a      | 7    | 3                  | 0.3  | 2                  | 0.2  | 3                  | 0.4     | 0.3  | 0.1    | 0                    | 0.0    | 0                    | 0.0    | 0                    | 0.0     | 0.0 | 0.0   | 0.00             |      |
| Q02KZ1                                          | Fatty acyl cis-trans isomerase OS=Pseudomonas aeru     | 8    | 10                 | 1.0  | 7                  | 0.8  | 13                 | 1.6     | 1.1  | 0.4    | 0                    | 0.0    | 1                    | 0.1    | 2                    | 0.2     | 0.1 | 0.1   | 0.1              | 0.02 |
